# Supplementary material for: White matter hyperintensities, cognitive decline and dementia risk in a community- dwelling cohort of northern Manhattan
Source: Research Square preprint supplement (doi:10.21203/rs.3.rs-9634268/v1), 2026-06-04
Supplement: Supplementary file 1 [file f4887fd5a6e6a439d81cc336.docx]

| Table 1: Demographics | | | |
| --- | --- | --- | --- |
|  | | | NOMAS (N=1290) |
| Age (in years, mean ± SD) | | | 70.6 ± 8.9 |
| Female sex (%) | | | 780 (60.4) |
| Race/ethnicity | | |  |
|  | | Non-Hispanic White | 191 (14.8) |
|  | | Non-Hispanic Black | 223 (17.3) |
|  | | Hispanic | 847 (65.7) |
|  | | Other | 29 (2.2) |
| Education (in years, mean, median, IQR) | | | 9.7, 10, 5-14 |
| Hypertension at baseline MRI (%) | | | 1010 (78.3) |
| Diabetes at baseline MRI (%) | | | 329 (25.5) |
| Hypercholesterolemia at baseline MRI (%) | | | 1047 (81.2) |
| Current smoking at baseline MRI (%) | | | 151 (11.7) |
| ApoE 4 carrier (%) | | | 312 (24.2) |
| White matter hyperintensity volume (mean ± SD, median, IQR) | | | 7.8 ± 9.92, 4.2, 2.4-8.6 |
| Follow-up time (in years, mean, median, IQR) | | | 8.85, 9.64, 5.06-12.6 |
| Covert brain infarct at baseline MRI (%) | | | 237 (18.3) |
| Crude incidence rate  (per 1,000 person-years) (95% CI) | | |  |
|  | Dementia | | 20.02 (17.5-22.8) |
| Abbreviations: IQR, interquartile range; CI, confidence interval. | | | |

| Table 2: Prevalent log-transformed white matter hyperintensities (WMH) with cognitive performance at baseline (cross-sectional) | | | | | | | |
| --- | --- | --- | --- | --- | --- | --- | --- |
|  | | | Global | Executive Function | Episodic Memory | Semantic Memory | Processing Speed |
|  | |  | β-estimate (SE) | | | | |
| Total WMH | |  | -0.007 (0.002)  p < 0.001 | -0.004 (0.003)  p = 0.15 | -0.010 (0.002)  p < 0.001 | -0.006 (0.002)  p = 0.006 | -0.011 (0.002)  p < 0.001 |
| M1 | Subcortical WMH |  | -0.013 (0.009)  p = 0.14 | -0.002 (0.013)  p = 0.88 | -0.015 (0.014)  p = 0.28 | -0.012 (0.012)  p = 0.31 | -0.015 (0.014)  p = 0.28 |
| Periventricular WMH |  | -0.007 (0.004)  p = 0.14 | -0.002 (0.007)  p = 0.74 | -0.010 (0.007)  p = 0.14 | -0.009 (0.006)  p = 0.13 | -0.009 (0.007)  p = 0.15 |
| Posterior Fossa |  | -0.049 (0.037)  p = 0.17 | -0.096 (0.054)  p = 0.07 | -0.009 (0.055)  p = 0.86 | -0.066 (0.049)  p = 0.17 | -0.026 (0.055)  p = 0.63 |
| M2 | Anterior circulation |  | -0.009 (0.003)  p = 0.001 | -0.003 (0.004)  p = 0.48 | -0.011 (0.004)  p = 0.004 | -0.010 (0.003)  p = 0.003 | -0.011 (0.004)  p = 0.005 |
| Posterior circulation |  | -0.043 (0.038)  p = 0.26 | -0.111 (0.057)  p = 0.05 | 0.002 (0.058)  p = 0.96 | -0.063 (0.051)  p = 0.21 | -0.001 (0.058)  p = 0.98 |
| M3 | Right anterior circulation |  | -0.033 (0.017)  p = 0.05 | -0.035 (0.024)  p = 0.14 | -0.062 (0.025)  p = 0.01 | -0.0002 (0.022)  p = 0.99 | -0.027 (0.025)  p = 0.28 |
| Left anterior circulation |  | 0.011 (0.018)  p = 0.54 | 0.029 (0.025)  p = 0.25 | 0.035 (0.026)  p = 0.17 | -0.019 (0.023)  p = 0.39 | -0.011 (0.026)  p = 0.65 |
| Posterior circulation |  | -0.025 (0.038)  p = 0.51 | -0.094 (0.056)  p = 0.09 | 0.038 (0.057)  p = 0.50 | -0.062 (0.051)  p = 0.22 | 0.018 (0.058)  p = 0.75 |
| Models adjusted for age, sex, race/ethnicity, years of education, prevalent hypertension, diabetes, smoking, hypercholesterolemia, depression, Apolipoprotein ε4 (ApoE4) carrier status, covert brain infarcts, and total cranial volume.  P<0.05, P=0.05-0.1. | | | | | | | |

| Table 3: Prevalent log-transformed white matter hyperintensities (WMH) and cognitive decline (longitudinal) | | | | | | | |
| --- | --- | --- | --- | --- | --- | --- | --- |
|  | | | Global | Executive Function | Episodic Memory | Semantic Memory | Processing Speed |
|  | |  | β-estimate (SE) | | | | |
| Total WMH | |  | -0.009 (0.002)  p < 0.001 | -0.003 (0.004)  p = 0.39 | -0.012 (0.003)  p < 0.001 | -0.010 (0.004)  p = 0.008 | -0.014 (0.004)  p < 0.001 |
| M1 | Subcortical WMH |  | -0.021 (0.014)  p = 0.13 | -0.010 (0.019)  p = 0.58 | -0.033 (0.019)  p = 0.07 | -0.025 (0.021)  p = 0.22 | -0.013 (0.020)  p = 0.52 |
| Periventricular WMH |  | -0.005 (0.006)  p = 0.41 | 0.008 (0.009)  p = 0.36 | -0.005 (0.009)  p = 0.58 | -0.009 (0.010)  p = 0.35 | -0.016 (0.009)  p = 0.08 |
| Posterior Fossa |  | -0.124 (0.056)  p = 0.02 | -0.186 (0.072)  p = 0.01 | -0.095 (0.073)  p = 0.19 | -0.136 (0.081)  p = 0.09 | -0.064 (0.076)  p = 0.39 |
| M2 | Anterior circulation |  | -0.011 (0.004)  p = 0.006 | 0.002 (0.005)  p = 0.76 | -0.014 (0.005)  p = 0.009 | -0.015 (0.006)  p = 0.01 | -0.016 (0.006)  p = 0.005 |
| Posterior circulation |  | -0.151 (0.059)  p = 0.009 | -0.234 (0.076)  p = 0.002 | -0.103 (0.077)  p = 0.18 | -0.155 (0.085)  p = 0.06 | -0.089 (0.080)  p = 0.26 |
| M3 | Right anterior circulation |  | -0.030 (0.027)  p = 0.28 | -0.024 (0.036)  p = 0.50 | -0.050 (0.036)  p = 0.16 | 0.003 (0.040)  p = 0.94 | -0.033 (0.038)  p = 0.39 |
| Left anterior circulation |  | -0.004 (0.028)  p = 0.88 | 0.027 (0.037)  p = 0.46 | 0.011 (0.037)  p = 0.77 | -0.032 (0.041)  p = 0.43 | -0.023 (0.039)  p = 0.55 |
| Posterior circulation |  | -0.137 (0.059)  p = 0.01 | -0.232 (0.076)  p = 0.002 | -0.083 (0.077)  p = 0.27 | -0.150 (0.085)  p = 0.07 | -0.077 (0.081)  p = 0.34 |
| Models adjusted for age, sex, race/ethnicity, years of education, prevalent hypertension, diabetes, smoking, hypercholesterolemia, depression, Apolipoprotein ε4 (ApoE4) carrier status, covert brain infarcts, and total cranial volume.  P<0.05, P=0.05-0.1. | | | | | | | |

| Table 4: Prevalent log-transformed white matter hyperintensities (WMH) and dementia risk | | |
| --- | --- | --- |
|  | | HR, 95% confidence interval |
| M0 | Total WMH | 1.032 (1.019, 1.045) |
| M1 | Subcortical WMH | 1.034 (0.957, 1.117) |
| Periventricular WMH | 1.024 (0.987, 1.062) |
| Posterior Fossa | 0.951 (0.598, 1.514) |
| M2 | Anterior circulation | 1.026 (1.006, 1.047) |
| Posterior circulation | 1.008 (0.619, 1.641) |
| M3 | Right anterior circulation | 1.089 (0.912, 1.299) |
| Left anterior circulation | 1.015 (0.850, 1.212) |
| Posterior circulation | 0.887 (0.542, 1.451) |
| Models adjusted for age, sex, race/ethnicity, years of education, prevalent hypertension, diabetes, smoking, hypercholesterolemia, depression, Apolipoprotein ε4 (ApoE4) carrier status, covert brain infarcts, and total cranial volume.  P<0.05, P=0.05-0.1. | | |
